# Supplementary material for: PD-L1 Expression in Human Breast Cancer Stem Cells Is Epigenetically Regulated through Posttranslational Histone Modifications
Source: Hindawi journal article supplement (doi:10.1155/2019/3958908), 2019-02-21
Supplement: f1 [file 3958908.f1.pdf]

**Table S1: Primer sequences used in this study****a) RT-qPCR primers**

| <b>Genes</b>   | <b>Forward primer (5'-3')</b> | <b>Reverse primer (5'-3')</b> |
|----------------|-------------------------------|-------------------------------|
| PD-L1          | TGGCATTGCTGAACGCATTT          | TGCAGCCAGGTCTAATTGTTTT        |
| TET-1          | CATCAGTCAAGACTTTAAGCCCT       | CGGGTGGTTTAGGTTCTGTTT         |
| TET-2          | GATAGAACCAACCATGTTGAGGG       | TGGAGCTTTGTAGCCAGAGGT         |
| TET-3          | GCCGGTCAATGGTGCTAGAG          | CGGTTGAAGGTTTCATAGAGCC        |
| DNMT3a         | CCGATGCTGGGGACAAGAAT          | CCCGTCATCCACCAAGACAC          |
| DNMT3b         | AGGGAAGACTCGATCCTCGTC         | GTGTGTAGCTTAGCAGACTGG         |
| $\beta$ -ACTIN | AGAGCTACGAGCTGCCTGAC          | AGCACTGTGTTGGCGTACAG          |

**b) PCR primers for CpG methylation analysis**

| <b>Genes</b>   | <b>Forward primer (5'-3')</b> | <b>Reverse primer (5'-3')</b> |
|----------------|-------------------------------|-------------------------------|
| PD-L1 promoter | TTGTTTTGGGTAGAGGTGGG          | AAAAACCAAATACATTACCTATTCTTA   |

**c) Sequencing Primer**

| <b>Genes</b> | <b>Forward primer (5'-3')</b> | <b>Reverse primer (5'-3')</b> |
|--------------|-------------------------------|-------------------------------|
| M-13         | TGTAAAACGACGGCCAGT            | CAGGAAACAGCTATGACC            |

**d) ChIP-qPCR primers**

| <b>Genes</b>   | <b>Forward primer (5'-3')</b> | <b>Reverse primer (5'-3')</b> |
|----------------|-------------------------------|-------------------------------|
| PD-L1 promoter | TATTTATAAGGTGGAAGTTTTG<br>AGG | TGCCCAAGGCAGCAAATCCAG         |
